1 **Full Title: Geospatial modeling of pre-intervention prevalence of**  
2 ***Onchocerca volvulus* infection in Ethiopia as an aid to onchocerciasis**  
3 **elimination**

4 **Short title:** Geospatial modeling of onchocerciasis infection in Ethiopia

5 **Authors:** Himal Shrestha (1), Karen McCulloch (1, 2), Shannon M Hedtke (1), Warwick N  
6 Grant (1)

7 **Author affiliations:**

8 (1) Department of Environment and Genetics, School of Agriculture, Biomedicine and  
9 Environment, La Trobe University, Bundoora, Australia

10 (2) WHO Collaborating Centre for Viral Hepatitis, Victorian Infectious Diseases Reference  
11 Laboratory, Royal Melbourne Hospital, and Department of Infectious Diseases, University of  
12 Melbourne, at the Peter Doherty Institute for Infection and Immunity, Australia

13 **Corresponding author:** Shannon Hedtke, S.Hedtke@latrobe.edu.au

14

## 15 **Abstract**

### 16 **Background**

17 Onchocerciasis is a neglected tropical and filarial disease transmitted by the bites of blackflies,  
18 causing blindness and severe skin lesions. The change in focus for onchocerciasis management  
19 from control to elimination requires thorough mapping of pre-control endemicity to identify  
20 areas requiring interventions and to monitor progress. *Onchocerca volvulus* infection prevalence  
21 in sub-Saharan Africa is spatially continuous and heterogeneous, and highly endemic areas may  
22 contribute to transmission in areas of low endemicity or vice-versa. Ethiopia is one such  
23 onchocerciasis-endemic country with heterogeneous *O. volvulus* infection prevalence, and many  
24 districts are still unmapped despite their potential for *O. volvulus* infection transmission.

### 25 **Methodology/Principle findings**

26 A Bayesian geostatistical model was fitted for retrospective pre-intervention nodule prevalence  
27 data collected from 916 unique sites and 35,077 people across Ethiopia. We used multiple  
28 environmental, socio-demographic, and climate variables to estimate the pre-intervention  
29 prevalence of *O. volvulus* infection across Ethiopia and to explore their relationship with  
30 prevalence. Prevalence was high in southern and northwestern Ethiopia and low in Ethiopia's  
31 central and eastern parts. Distance to the nearest river (-0.015, 95% BCI: -0.025 – -0.005),  
32 precipitation seasonality (-0.017, 95% BCI: -0.032 – -0.001), and flow accumulation (-0.042,  
33 95% BCI: -0.07 – -0.019) were negatively associated with *O. volvulus* infection prevalence,  
34 while soil moisture (0.0216, 95% BCI: 0.014 – 0.03) was positively associated.

### 35 **Conclusions/Significance**

36 Infection distribution was correlated with habitat suitability for vector breeding and associated  
37 biting behavior. The modeled pre-intervention prevalence can be used as a guide for determining  
38 priority for intervention in regions of Ethiopia that are currently unmapped, most of which have  
39 comparatively low infection prevalence.

#### 40 **Author's summary**

41 Areas with unknown onchocerciasis endemicity may pose a threat to the goal of eliminating  
42 transmission: they may re-introduce onchocerciasis to areas where interventions have been  
43 successful. Additionally, because the vectors (and thus *Onchocerca volvulus* transmission) have  
44 specific ecological requirements for growth and development, changes in these ecological factors  
45 due to human activities (deforestation, modification of river flows by dam construction, climate  
46 change) might change patterns of parasite transmission and endemicity. To estimate the impact  
47 of these environmental changes, we must first identify ecological factors that determine  
48 transmission and prevalence. We have employed Bayesian geostatistical modeling to create a  
49 nationwide *O. volvulus* infection prevalence map for Ethiopia based on pre-intervention nodule  
50 prevalence and have explored the effect of environmental variables on *O. volvulus* infection  
51 prevalence. We have also identified areas that need additional data to increase the prediction  
52 accuracy of the map. We found that hydrological variables such as distance to the nearest river,  
53 precipitation seasonality, soil moisture, and flow accumulation are associated significantly with  
54 *O. volvulus* infection prevalence. We show that the pre-intervention prevalence can be estimated  
55 based on the ecological data and that predicted prevalence can be used as a guide to prioritize  
56 pre-intervention mapping.

## 57 **Introduction**

58 Mapping infection prevalence is fundamental for control and elimination because it is used to  
59 estimate the disease burden and to design and monitor the impacts of interventions. Often the  
60 prevalence data are present in the form of point data at different locations and time points, and  
61 are aggregated at different administrative levels (1). However, disease risk is a spatially  
62 continuous phenomenon that extends across and beyond administrative borders (2). In addition,  
63 mapping strategies change depending on the intended endpoint of the intervention (3): when  
64 elimination of transmission is the goal, the spatial heterogeneity in disease prevalence has to be  
65 quantified accurately so that appropriate interventions can be implemented and, where possible,  
66 implementation and monitoring can be informed by the spatial distribution of infection rather  
67 than simply along local administrative organizational boundaries. When resources or  
68 accessibility to an endemic region are limited, as is the case for many neglected tropical diseases,  
69 such thorough data collection may not be possible and methods to extrapolate likely prevalence  
70 would be useful.

71 Using geostatistical modeling techniques, point prevalence data can be transformed into a  
72 continuous spatial prevalence map of varying endemicity (2, 4), rather than reporting binary  
73 categorization of areas as endemic or non-endemic (5). These continuous maps can extrapolate  
74 the prevalence measures to previously unmapped regions based on the spatial autocorrelation  
75 between the prevalence measures and the influence of known ecological and socio-demographic  
76 factors. In addition, geostatistical models provide unbiased quantification of the uncertainty  
77 associated with the prevalence estimates.

78 Onchocerciasis is a neglected tropical disease caused by infection with a filarial nematode,  
79 *Onchocerca volvulus*, that is transmitted by the bites of blackflies (*Simulium* spp.). The vectors

80 have a specific ecological niche: they breed around fast-flowing rivers, requiring high aeration  
81 and oxygen content for larval development (6). The flies show diurnal activity and bite humans  
82 living in communities near these rivers (7-9). If the biting blackfly carries the infective stage of  
83 the parasite (the 3<sup>rd</sup> stage larvae, or iL3), the larva leaves the blackfly and enters the human host.  
84 Inside the human body, the larva develops into an adult worm and forms a nodule, generally  
85 localized subcutaneously. People living with onchocerciasis show a range of chronic clinical  
86 manifestations, including onchodermatitis, severe itching, rashes, and visual impairment that  
87 may culminate in blindness (10). More recently, it has also been linked with epilepsy and  
88 nodding syndrome in children (11, 12).

89 Onchocerciasis is currently targeted for elimination via community-directed mass drug  
90 administration with ivermectin (MDAi), either annually, semi-annually, or, in some areas, up to  
91 four times a year (13). *Onchocerca volvulus* infection prevalence is measured using counts of  
92 microfilariae (mf) in a small of skin biopsy (skin snipping), physical examination for the  
93 presence of nodules (nodule palpitation), or antibody tests that detect the presence of antibodies  
94 against the parasite Ov16 antigen (14). Rapid Epidemiological Mapping of Onchocerciasis  
95 (REMO) uses nodule palpation in combination with geographic information system mapping,  
96 and was used by the African Programme for Onchocerciasis Control (APOC) to map prevalence  
97 in twenty countries from 1996 to 2012 (15, 16). REMO revealed that the prevalence of  
98 *O. volvulus* infection was patchy and heterogenous across Africa (17) and identified areas for  
99 ivermectin intervention (3, 15) using a threshold for treatment set at a nodule prevalence of 20%.

100 Onchocerciasis-endemic communities were divided into hypoendemic (nodule prevalence: <  
101 20%), meso-endemic (nodule prevalence: 20–45%), and hyperendemic (nodule prevalence: >

102 45%) (17, 18) based on nodule prevalence. However, there are still many areas that are  
103 unmapped and in which the infection prevalence is not known (19).

104 In onchocerciasis-endemic Ethiopia, mapping of prevalence has been focused on the western  
105 districts based on the high incidence of onchocerciasis and because environmental factors favor  
106 blackfly breeding in these regions (20). In contrast, eastern Ethiopia has been assumed to be free  
107 of *O. volvulus* infection, which has generally proven true (21). However, a recent continent-level  
108 mapping (19) found that most of the implementation units that were predicted to be suitable for  
109 onchocerciasis in Ethiopia were not mapped, posing a risk to elimination goals. In addition, there  
110 is high spatial variability of onchocerciasis endemicity in Ethiopia, ranging from 0% in some  
111 areas to as high as 84% in some areas of southwest Ethiopia (21, 22).

112 MDAi started in some Ethiopian hyperendemic foci in 2002 (20) and, to our knowledge, there  
113 has not been coordinated vector control in Ethiopia. The shift to onchocerciasis elimination  
114 officially began in 2013 with a goal to eliminate transmission by 2020 (20, 22): the program  
115 moved from annual to biannual treatment strategy in all the known endemic areas and scaled up  
116 treatment to other additional endemic areas which were not treated previously (22). Cross-border  
117 coordination of MDAi between transmission foci in northwestern Ethiopia and bordering Sudan  
118 is ongoing (13). In some cases, transmission decline without intervention has also been reported  
119 (23) but onchocerciasis persists in some areas despite MDAi for a variety of reasons, including  
120 challenges with treatment compliance (24-26), civil unrest (27, 28), and lately the COVID-19  
121 pandemic (29). In addition, there has been variation in the history and the frequency of MDAi.  
122 Most of the hyper- and mesoendemic districts have been treated over two decades, while in  
123 hypoendemic districts, MDAi started around 2014 following the policy shift from control to  
124 elimination (22).

125 There is no national-level baseline endemicity map of *O. volvulus* infection prevalence for  
126 Ethiopia, which has created difficulty in quantifying the effect of MDAi on a national scale.  
127 Baseline/pre-control endemicity is an important indicator of morbidity and a predictor for the  
128 time required for elimination (18, 30-32). In addition, the prevalence measures before  
129 intervention provide an unbiased relationship between the infection prevalence and  
130 environmental variables. Prevalence and onchocerciasis suitability mapping for Ethiopia in  
131 previous studies (17, 19) have been done as part of continental-scale research, although Zouré et  
132 al.(17) did not consider environmental factors, and Cromwell et al. (19) used presence-absence  
133 data which do not capture the magnitude of the prevalence. Although these studies helped to  
134 place *O. volvulus* infection prevalence or risk in a broader ecological and epidemiological  
135 context, we have focused on a spatial scale which offers us greater flexibility to explore  
136 ecological patterns unique to Ethiopia by incorporating both the magnitude of prevalence and  
137 associated ecological variables (33). We develop a geostatistical model for the distribution of  
138 pre-intervention nodule prevalence of *O. volvulus* infection prevalence in Ethiopia using this  
139 approach that considers spatial variation in environmental and socio-demographic variables.  
140 Furthermore, we identify the most important environmental and socio-demographic variables  
141 contributing to *O. volvulus* infection prevalence, and present estimates of uncertainty in the  
142 predicted prevalence that can be used to target areas for further mapping efforts.

## 143 **Methods**

### 144 **Prevalence data**

145 *Onchocerca volvulus* infection prevalence data with site-specific coordinates for Ethiopia were  
146 obtained from the publicly available Expanded Special Project for Elimination of Neglected  
147 Tropical Diseases (ESPEN) database (34). Nodule prevalence data were collected as part of  
148 REMO mapping before the initiation of MDAi, from the year 2001 to 2012, examining the  
149 presence of palpable onchocercal nodules in 30 to 50 adults randomly selected from each  
150 surveyed village (15, 20). The protocols for the REMO assessment are available in the published  
151 guidelines (35). There were 927 geopositioned coordinates for nodule prevalence in 36,010  
152 people. Any observations from the same geographic coordinates at different times were  
153 aggregated by adding the number of cases observed and the number of total tests done before  
154 calculating the prevalence.

155 Although the database contains both nodule prevalence data and skin mf prevalence data, in this  
156 analysis, only nodule prevalence data were considered for the geospatial analysis because of the  
157 limited number of skin mf sampled ( $n = 126$ ) before MDAi, which limits its utility for  
158 identifying associations between prevalence and environmental variables. That said, skin mf data  
159 were used to assess the correlation between skin mf as a measure of *O. volvulus* infection and the  
160 nodule prevalence measure, which revealed two outlier observations with very high nodule  
161 prevalence but with low skin mf prevalence. These were excluded from the dataset because the  
162 low skin mf prevalence could not be attributed to a reasonable cause, such as MDAi, as the data  
163 were collected before ivermectin distribution. Thus, the final dataset contained nodule  
164 prevalence data from 916 unique sites and 35,077 people (Fig 1).



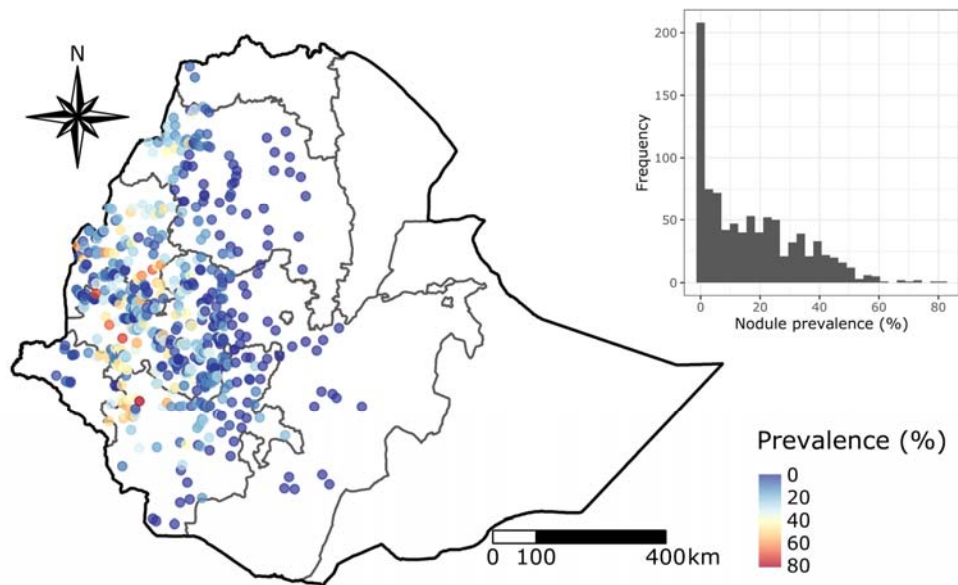

165

166 **Fig 1. Sites and the nodule prevalence measured during Rapid Epidemiological Mapping of**  
167 **Onchocerciasis (REMO) in Ethiopia.** The grey boundary on the map represents administrative  
168 regions. The inset figure shows the histogram of the prevalence.

169 **Environmental, climate, and socio-demographic variables**

170 Variables relevant to *O. volvulus* infection prevalence and *Simulium* ecology based on published  
171 literature were assembled from different sources and were exported as a raster layer at a  
172 resolution of 1 km using Google Earth Engine (6, 36-39) (S1 Table). Raster layers with higher  
173 resolution were downsampled using a mean aggregation method, whereas the raster layers with  
174 lower resolution were resampled to align with 1 km resolution (40) to prepare a raster stack of  
175 uniform resolution. Raster data were processed using the *raster* package in R version 4.1.0 (41-  
176 43). Downloaded raster variables were reprojected to a standard projection, World Geodetic  
177 System 1984 (WGS84). The raster covariates were cropped to the boundary of Ethiopia (S1 Fig),  
178 and a raster stack of covariates was prepared. The measurement of different covariates at each  
179 sample site was extracted from the raster stack.

## 180 **Variable selection**

181 Thirty-two variables were grouped into six major categories: elevation, temperature,  
182 precipitation, socio-demographic, hydrological, and vegetation (S1 Table), and the initial  
183 selection of covariates was conducted separately for each category. During the initial rounds of  
184 variable selection, multi-collinearity was assessed among the variables by calculating the  
185 Spearman's rank correlation matrix and a variable inflation factor (VIF) for the linear model,  
186 including the variables, using the *GGally* and *car* packages in R (44, 45). Next, any variables with  
187 an absolute correlation coefficient less than 0.8 with other variables within the group were  
188 selected (46). For the set of covariates with a correlation coefficient greater than 0.8 and a VIF  
189 greater than 10, only one of the covariates was selected (33, 47). The VIF measures how easily a  
190 given predictor can be predicted from a linear regression based on other predictors. The predictor  
191 with the lowest VIF score was selected among the set of correlated covariates. The final  
192 covariates yielded a correlation matrix of less than 0.8 (S2 Fig) and a VIF factor of less than 10  
193 (S2 Table). Based on this initial round of analysis, a set of 16 covariates were selected.

194 Model fit was assessed based on the Deviance Information Criterion (DIC) and Widely  
195 Applicable Information Criterion (WAIC) scores (48). We ran a univariate regression model and  
196 calculated the DIC and WAIC scores for the respective univariate models. A covariate yielding  
197 the least DIC and WAIC scores from each category was selected. Combinations of other  
198 variables were further explored if their inclusion further optimized the model fit scores. Eight  
199 covariates from the pool of 16 possible were selected for downstream geostatistical analysis (S3  
200 Table).

## 201 **Geo-statistical modelling framework**

202 A Bayesian geostatistical model was implemented using the Integrated Nested Laplace  
203 Approximation (INLA) approach, which has been reported to be computationally efficient for  
204 posterior distribution calculation and has been employed in recent large-scale geostatistical  
205 models (33, 46, 49, 50). Geostatistical approaches assume a positive spatial correlation between  
206 observations; i.e., the observations nearer to each other are more related than the farther ones.  
207 Information from neighboring pixels can then be utilized to allow smoothing of extreme values  
208 due to small sample sizes and give reliable and robust estimates from sparse data (33, 51).  
209 Further, the hierarchical structure of the model permits the estimation of covariate effects, spatial  
210 covariance structure, and the prediction of missing data (33). These models incorporate both  
211 fixed and random effects. The fixed effects determine the influence of covariates on *O. volvulus*  
212 infection prevalence, while the random effects account for the spatial variation that determines  
213 anomalous regions of high and low prevalence (46). This model can thus identify the relationship  
214 between infection prevalence data and several predictors and quantify spatial dependence via the  
215 covariance matrix of a Gaussian process facilitated by adding random effects to the observed  
216 locations (49).

## 217 **Model fitting**

218 Conditional on the true prevalence  $P(x_i)$  at location  $x_i = 1, 2, 3 \dots n$ , the number of cases ( $Y_i$ )  
219 observed out of the total number of people tested ( $N_i$ ) were assumed to follow a binomial  
220 distribution.

$$Y_i | P(\mathbf{x}_i) \sim \text{Binomial}(N_i, P(\mathbf{x}_i))$$

221 The log odds of prevalence is modeled as

$$\text{logit}(P(\mathbf{x}_i)) \sim \beta_0 + X_i^T \beta + S(\mathbf{x}_i)$$

222 where  $\beta_0$  is the intercept,  $X_i^T \beta$  are the vectors of covariates and their coefficients.  $S(\mathbf{x}_i)$  is a  
223 spatial random effect with zero-mean Gaussian process following the Matérn covariance  
224 function which is defined by the equation:

$$\text{Cov}(S(\mathbf{x}_i), S(\mathbf{x}_j)) = \frac{\sigma^2}{2^{\nu-1} \Gamma(\nu)} (\kappa \|\mathbf{x}_i - \mathbf{x}_j\|)^{\nu} K_{\nu}(\kappa \|\mathbf{x}_i - \mathbf{x}_j\|)$$

225 Here,  $K_{\nu}$  is the modified Bessel function of the second kind and order  $\nu > 0$ ,  $\nu$  is the smoothness  
226 parameter, and  $\sigma^2$  is the marginal variance (46).  $\kappa > 0$  is the scaling parameter related to the  
227 practical range  $\rho$ , the distance at which the correlation between two points is approximately zero.  
228 However, if  $\rho = 8\nu\kappa$ , at this range, the spatial correlation is close to 0.1 (9, 46). Default priors  
229 were used for the intercept parameter, effect parameters for the covariates, and the  
230 hyperparameters in the model as defined in Moraga, p. 35–37 (2).

### 231 **Accounting for excess zero prevalence**

232 The binomial distribution is governed by only a single parameter which does not address  
233 overdispersion. To account for the excess zero prevalence in the data (Fig 1), zero-inflated  
234 binomial models (ZIB) Type 0 and Type 1 were also considered. There are structural zeros  
235 (prevalence reported to be zero based on reality) and sample zeros (prevalence reported to be  
236 zero based on chance) in any probability distribution (48, 52). Type 0 model considers only the  
237 structural zeros, while Type 1 considers both the structural and sample zeros. With ZIB Type 0  
238 model, the probability density function for the observed cases is

$$p(Y_i | P(\mathbf{x}_i), P_0) = P_0 I(Y_i = 0) + (1 - P_0) I(Y_i > 0) \binom{N_i}{Y_i} P(\mathbf{x}_i)^{Y_i} (1 - P(\mathbf{x}_i))^{N_i - Y_i}$$

239 Here,  $P_0$  is the proportion of structural zeros,  $(1 - P_0)$  is the proportion of sample zeros, and  
240  $I(Y_i = 0)$  is the indicator variable. When both structural zeros and sample zeros are considered,  
241 i.e., Type 1, the observations follow the probability density function:

$$p(Y_i|P(\mathbf{x}_i), P_0) = P_0 I(Y_i = 0) + (1 - P_0) \binom{N_i}{Y_i} P(\mathbf{x}_i)^{Y_i} (1 - P(\mathbf{x}_i))^{N_i - Y_i}$$

242 To determine the best fit model for the nodule prevalence data, model fit statistics (DIC and  
243 WAIC) were calculated for each model, viz. binomial, ZIB Type I, and ZIB Type 0.

#### 244 **Mesh construction**

245 We assume an underlying spatially continuous variable for the observed geostatistical data,  
246 which can be modeled with Gaussian random fields. We used the Stochastic Partial Differential  
247 Equation (SPDE) approach in the *INLA* package to fit a spatial model and to predict each  
248 variable of interest at an unsampled location (2, 53). An approximate solution to SPDE can be  
249 found using the finite element method. The finite element representation of the Matérn field is  
250 used as a linear combination of basis functions defined on a triangulation of domain  $D$  (54).  
251 Domain  $D$  is subdivided into a triangulated mesh which is formed first by placing the triangle's  
252 vertices at the sample locations and then adding other vertices around the regions of spatial  
253 prediction.

254 We constructed the finite element mesh for SPDE approximation to the Gaussian process  
255 regression using the boundary of Ethiopia. Triangulation meshes with different cut-off  
256 parameters and the maximum length for the triangle inside and outside the boundary were tested  
257 for their model fit and computation cost. The mesh that yielded the lowest DIC and WAIC scores  
258 without significantly increasing computational cost was chosen.

## 259 **Cross-validation**

260 K-fold cross-validation (with  $k = 10$ ) was run to observe the differences in the predictive  
261 accuracy of the candidate models. Different measures of predictive accuracy were calculated by  
262 assessing the relationship between the predicted and observed prevalence in the validation  
263 dataset. In 10-fold cross-validation, the dataset is divided into ten random sections (or folds) (39,  
264 46). Then, model validation runs are performed on each fold (10% of the data labeled the  
265 validation dataset) after fitting the data on the remaining nine folds (90% of the data labeled the  
266 training dataset). Thus, ten validation runs are performed for 10-fold cross-validation. During  
267 each validation run, both Spearman's rank correlation coefficient and the Root Mean Square  
268 Error (RMSE) between the observed data and the predicted data for validation samples were  
269 calculated to assess accuracy.

## 270 **Prediction**

271 The posterior distribution of prevalence was estimated at 5 km resolution, accounting for the  
272 effect of the variables and the spatial covariance structure. The covariate raster stack was  
273 aggregated to 5 km spatial resolution by taking either the mean or sum of the raster cells. The  
274 mean of raster cells was calculated for all continuous covariates except population count, for  
275 which the sum was calculated. Aggregated data were used to ease the computational burden  
276 associated with geospatial prediction at higher resolution. In addition, we calculated the  
277 aggregated mean, and the range of predicted prevalence values within a district/implementation  
278 unit (IUs). The predicted prevalence map was also used to assess the relationship with the  
279 environmental variables fitting the Generalized Additive Model (GAM) curve.

280

## 281 **Results**

282 We formulated a Bayesian geostatistical model using INLA to estimate the nationwide pre-  
283 intervention prevalence of *O. volvulus* infection in Ethiopia. Nodule prevalence data from 916  
284 unique geopositioned sites were combined with eight different environmental and socio-  
285 demographic covariates to construct the geostatistical model. Most of the prevalence data were  
286 from western Ethiopia, as eastern Ethiopia is largely unmapped for *O. volvulus* infection  
287 prevalence. The mean and the standard deviation of the observed prevalence across the sampling  
288 locations in Ethiopia was  $17.24 \pm 16.32\%$  ranging from 0 to 81.48%. There were 204 sites with  
289 zero prevalence (Fig 1).

### 290 **Model selection and fitting**

291 Four different types of model were tested for the nodule prevalence data viz. binomial without  
292 spatial structure, binomial with spatial structure, ZIB type 1 and ZIB type 2, both with spatial  
293 structure. These were done without including any environmental and socio-demographic  
294 variables in the model. The binomial model that did not account for spatial effects showed higher  
295 DIC (9806.988) and WAIC (9816.581) scores (S3 Fig). The addition of spatial effect and  
296 accounting for zero inflation with a Type I zero-inflated binomial model decreased the DIC and  
297 WAIC scores to 5661.098 and 5916.715, respectively. Thus, ZIB Type I with spatial structure  
298 was chosen for modeling the prevalence data. To optimize the SPDE mesh, six different  
299 triangulation meshes with different parameters were tested for their model fit and computation  
300 cost (S4 Fig, S4 Table). The mesh C yielded the best model fit scores (DIC = 4538.12; WAIC =  
301 4652.22). However, the mesh E yielded a comparable model fit (DIC = 4572.74; WAIC =  
302 4710.781) but was computationally more efficient (45.38 s vs. 1667.33 s) and therefore, mesh E  
303 was chosen for fitting the model.

304 We selected environmental and socio-demographic variables based on the model fit scores of the  
305 univariate model. Isothermality was selected from the group of temperature variables,  
306 precipitation seasonality from the group of precipitation, and similarly, population density,  
307 distance to the nearest river, slope, and Normalized Difference Vegetation Index (NDVI) were  
308 selected from the group of socio-demographic, hydrological, and vegetation groups of covariates,  
309 respectively. Other combinations were also explored and the inclusion of covariates like soil  
310 moisture and flow accumulation further reduced the DIC and WAIC scores (S3 Table).

311 K-fold cross-validation ( $k = 10$ ) was done for three different models: one without environmental  
312 covariates, one with six covariates, and the other with an additional two covariates (flow  
313 accumulation and soil moisture), which revealed that model 3 was superior to model 0 and 1 (S5  
314 Fig). For model 3, calculating the Spearman rank correlation coefficient between the observed  
315 prevalence and the predicted prevalence ranged from 0.48 to 0.70 with a median of 0.66.  
316 Similarly, the RMSE ranged from 11.09 to 15.1, with a median of 13.18. This suggested a good  
317 model fit and accuracy for predictions across the validation datasets.

### 318 **Model parameters**

319 The regression coefficients were estimated for each covariate included in the model. Since INLA  
320 is a Bayesian technique, the regression coefficients are a probability distribution rather than point  
321 estimates. A negative coefficient estimate implies a negative association of the variable with the  
322 prevalence and vice versa. The significance of the estimates was determined as described in  
323 Moraga et al. (55). The association was deemed significant only if both the 95% BCI values were  
324 below 0 for negative association and above 0 for positive association.



325 Out of 8 covariates considered for the final model, four covariates were significantly associated  
 326 (based on 95% BCI) with *O. volvulus* infection prevalence (Table 1). Soil moisture was  
 327 positively associated (0.0216, 95% BCI: 0.014 – 0.03) with *O. volvulus* infection prevalence,  
 328 whereas distance to the nearest river (-0.015, 95% BCI: -0.025 – -0.005), precipitation  
 329 seasonality (-0.017, 95% BCI: -0.032 – -0.001), and flow accumulation (-0.042, 95% BCI: -0.07  
 330 – -0.019) were negatively associated with *O. volvulus* infection prevalence. The regression  
 331 coefficient of significant variables was at least one to two orders of magnitude greater than the  
 332 non-significant ones.

333 **Table 1. Mean coefficient estimates and 95% Bayesian credible interval (BCI) for the**  
 334 **environmental and socio-demographic variables in the model.** Regression coefficients for a particular  
 335 covariate represent the change in  $\logit(P)$  for a unit change in that covariate given that all other variables  
 336 are kept constant.

| Variables                                                                                                    | Regression coefficients |                    |
|--------------------------------------------------------------------------------------------------------------|-------------------------|--------------------|
|                                                                                                              | Mean                    | 95% BCI            |
| Distance to the nearest river                                                                                | -0.01508                | (-0.0252, -0.005)  |
| Soil moisture                                                                                                | 0.02158                 | (0.0135, 0.0297)   |
| Flow accumulation                                                                                            | -0.04225                | (-0.0703, -0.0186) |
| Precipitation seasonality                                                                                    | -0.01645                | (-0.0324, -0.0005) |
| Vegetation index                                                                                             | 0.00168                 | (-0.0072, 0.0105)  |
| Slope                                                                                                        | 0.00097                 | (-0.0071, 0.009)   |
| Population density                                                                                           | 0.00005                 | (-0.0003, 0.0003)  |
| Isothermality                                                                                                | -0.00185                | (-0.0287, 0.0249)  |
| Intercept                                                                                                    | -1.94027                | (-4.9233, 1.0416)  |
| <b>Hyper-parameters</b>                                                                                      |                         |                    |
| Zero probability parameter                                                                                   | 0.33345                 | (0.327, 0.342)     |
| $\theta_1$ for spatial field                                                                                 | -1.33992                | (-1.417, -1.286)   |
| $\theta_2$ for spatial field                                                                                 | -0.09636                | (-0.17, -0.046)    |
| 95% BCI includes 0.025 quantiles and the 0.975 quantiles of the probability distribution of the coefficients |                         |                    |

337 Hyperparameters defining the SPDE mesh were used to calculate the spatial effect and project  
 338 the spatial field (S6 Fig). The spatial effect indicates the intrinsic spatial variability in the  
 339 prevalence estimates, helping us understand the data's spatial structure (47). Further, the spatial  
 340 field also represents the spatial effect that was not accounted for by the covariates included in the

341 model (55). The mean spatial field is higher in western Ethiopia while it is lower in central  
342 Ethiopia and eastern Ethiopia, along with the high standard deviation of the spatial field in the  
343 eastern parts.

#### 344 **Model prediction**

345 The predicted prevalence map shows spatial heterogeneity in *O. volvulus* infection prevalence in  
346 Ethiopia (Fig 2). Predicted *O. volvulus* infection prevalence is concentrated in the western parts  
347 of Ethiopia, with three to four hotspots in southwest Ethiopia. There is a relatively low  
348 prevalence of infection in eastern Ethiopia and near to zero prevalence in central Ethiopia. The  
349 range of predicted mean prevalence was 0.39 to 55.27%. Similarly, the lower limit of predicted  
350 infection prevalence ranged from 0 to 47.28%, while the upper limit of the predicted prevalence  
351 ranged from 1.41 to 65.32%. The correlation between the observed and the predicted prevalence  
352 was 0.71 (S7 Fig). Due to the geostatistical smoothing effect, some observations with higher  
353 prevalence were underestimated and vice-versa.

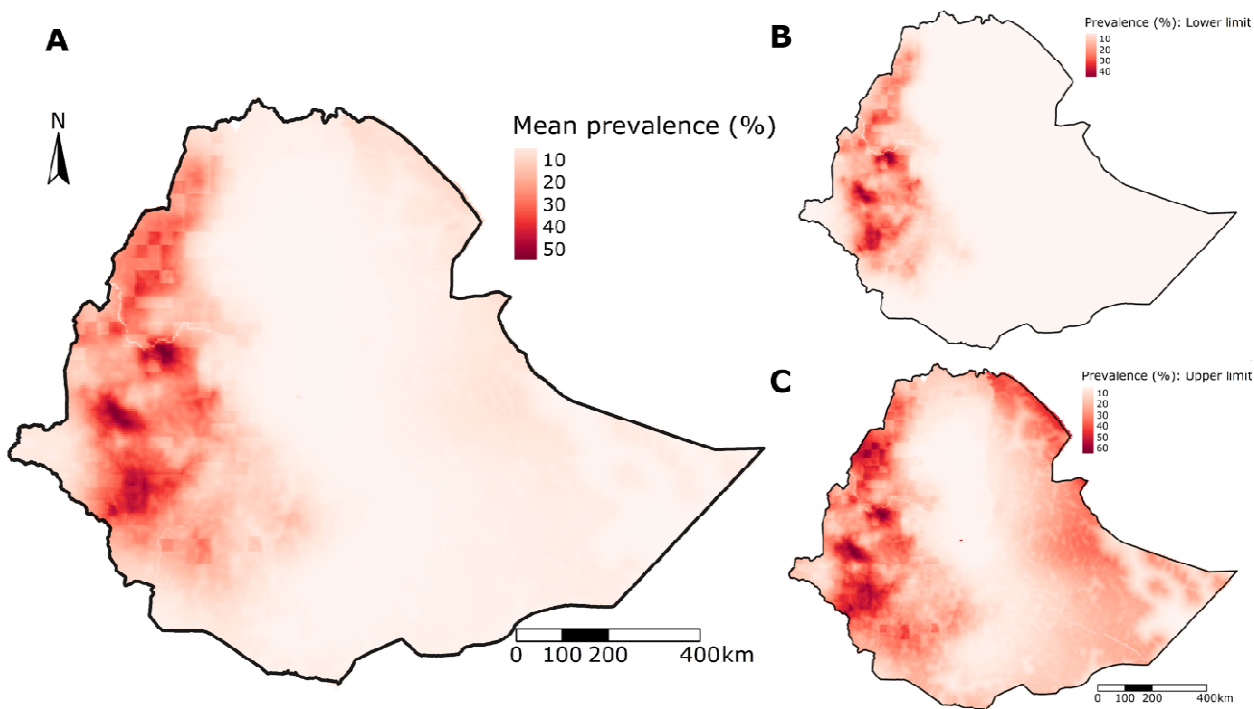

354

355 **Fig 2. *Onchocerca volvulus* infection prevalence map in Ethiopia generated from the**  
356 **geostatistical model.** The mean (A), the lower limit (B), and the upper limit (C) of *O. volvulus*  
357 infection prevalence. The prediction interval of the prevalence map is generated from the  
358 calculated 95% BCI of fitted prevalence values.

359 The uncertainty in the prevalence estimates was derived using the standard deviation of the  
360 posterior distribution. The uncertainty map shows that the presence of data influenced the  
361 uncertainty in the prevalence estimates; i.e., areas with the ground truth data have lower  
362 uncertainty (Fig 3A). The uncertainty was higher in eastern Ethiopia due to the lack of ground  
363 truth data from those sites. Most of central Ethiopia and some areas in eastern Ethiopia,  
364 regardless of the absence of the data, showed low prevalence with lower uncertainty (Fig 3B).  
365 There were areas with a high prevalence that had different levels of uncertainty in western  
366 Ethiopia. The regions with higher uncertainty almost always corresponded with sparse data from  
367 those regions.

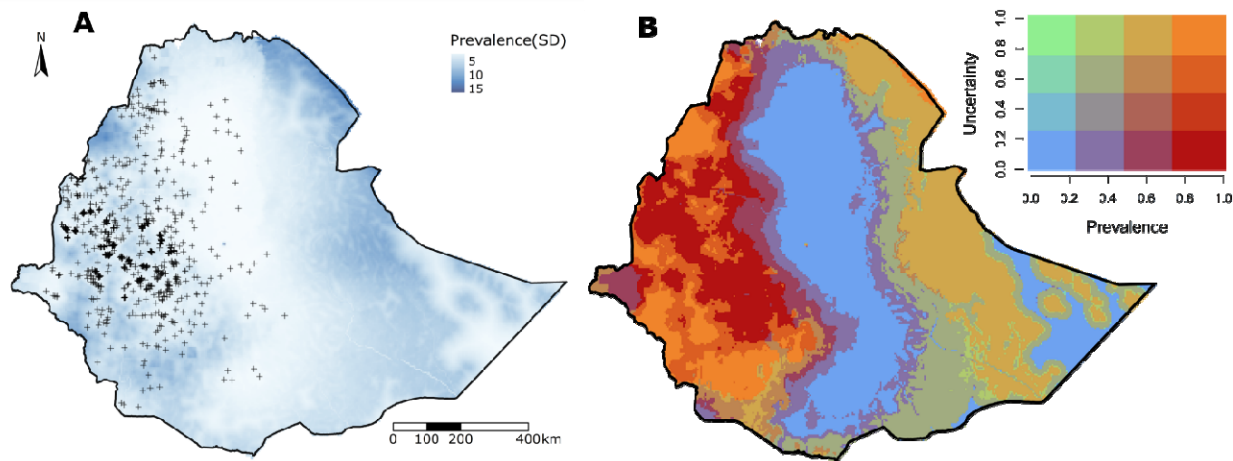

368

369 **Fig 3. Uncertainty in the estimates of *O. volvulus* infection prevalence from the model.** The  
370 standard deviation of the posterior distribution of prevalence (A) and the location of the  
371 observation are indicated by '+' on the map. The bivariate map (B) shows both prevalence and  
372 the uncertainty estimates rescaled from 0 to 1.

373 A district-level map was created by aggregating the mean prevalence from pixels within the  
374 respective districts which represent implementation units (IUs) for MDAi (Fig 4). The  
375 aggregated mean prevalence for the first dozen of the most endemic districts were greater than  
376 40%. The difference between the highest and the lowest estimated prevalence pixels (range of  
377 mean prevalence) within the districts was as high as 50.72% for a district within the Kemashi  
378 zone of Ethiopia.

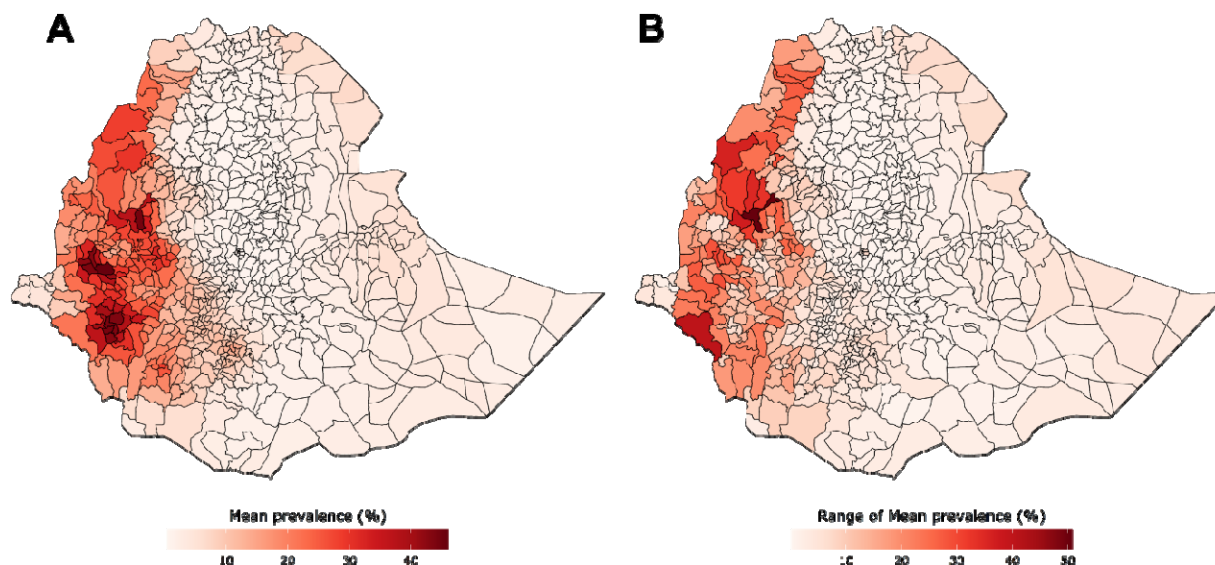

380 **Fig 4. The aggregated mean prevalence and the range of the estimated mean prevalence**  
381 **within Ethiopian districts.** The mean of the estimated prevalence of all the pixels within the  
382 district level border (A) and the range of the estimated prevalence within the district, i.e. the  
383 difference between the highest prevalence pixel and the lowest prevalence pixel (B), is shown.

#### 384 **Relationship of environmental and socio-demographic covariates on the prevalence**

385 A GAM curve was fitted between the predicted prevalence and the covariates used in the model  
386 to assess the relationship between them. The relationship profile of the predicted *O. volvulus*  
387 infection prevalence across the range of values of different covariates indicates which ecological  
388 conditions are suitable for onchocerciasis transmission (Fig 5). The relationship curve for the  
389 distance to the nearest river and the predicted prevalence shows the sharp decline in the *O.*  
390 *volvulus* infection prevalence to around 20-25 km, and the curve continues in the low prevalence  
391 region with increased uncertainty as distance increases from the nearest river (Fig 5). There was  
392 almost a linear increase in the predicted prevalence with an increase in soil moisture up to around  
393 18 mm.

394 There was a negative association with the flow accumulation with a considerable increase in  
395 uncertainty in the areas with high flow accumulation, i.e., larger rivers. Nevertheless, the areas

396 with lower flow accumulation had a higher predicted prevalence than those with higher flow  
397 accumulation, suggesting the importance of intermediate-sized rivers to onchocerciasis  
398 epidemiology in Ethiopia. In addition, the relationship curve for the slope shows that a certain  
399 degree of slope is favorable for *O. volvulus* infection prevalence (S8 Fig). There is a similar  
400 response profile for population density where intermediate population density is favorable for  
401 onchocerciasis transmission. There was a steep decline in predicted prevalence with the initial  
402 increase in precipitation seasonality. However, there was a mixed non-linear response in the  
403 regions with precipitation seasonality from 60 to 130 mm.

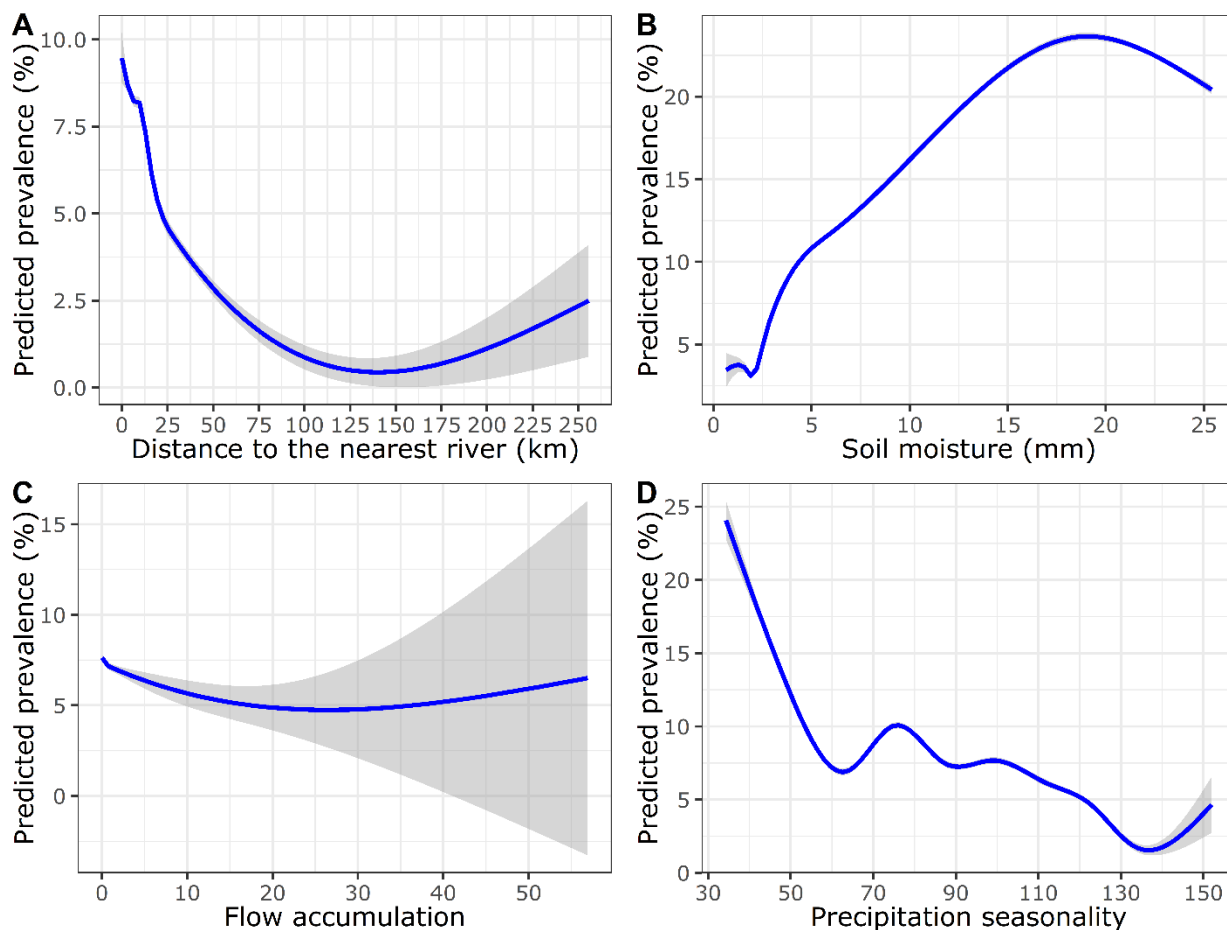

404

405 **Fig 5. The relationship between the predicted mean prevalence with the significant**  
406 **environmental covariates in the regression model.** The curve was fitted using a generalized  
407 additive model (GAM) using the smoothing function available in the *ggplot2* package. The

408 shaded region around the curve represents the 95% confidence interval. Flow accumulation had a  
409 range of high magnitude compared to other covariates (values ranged from 0 to 100418). Thus,  
410 this variable was rescaled from 0 to 100 to make its range comparable with other variables.

411

## 412 **Discussion**

413 We generated a country-level geospatial map of *O. volvulus* infection prevalence before the start  
414 of MDAi in Ethiopia, accounting for environmental and socio-demographic factors. The  
415 prevalence has been extrapolated to the country-level border of Ethiopia, including the eastern  
416 regions which were not mapped previously. Predicted prevalence in areas where people do not  
417 currently inhabit can indicate the risk of transmission should infected people establish  
418 communities. Prevalence was estimated using the pre-intervention nodule prevalence data and  
419 therefore represents the infection status before MDAi in Ethiopia. Thus, these predictions can act  
420 as a pre-control baseline map to on which decisions concerning new pre-MDAi mapping of  
421 likely hypoendemic areas that are not yet under MDAi can be prioritized and the effects of past  
422 interventions or of ecological changes at different locations can be assessed.

423 The predicted infection prevalence was found to be relatively low in the central parts of Ethiopia.  
424 This can be attributed to the presence of a significant geographical feature, the Great Rift valley.  
425 The elevated highlands along the center and lowland to the east of the Great Rift valley are  
426 characterized by low predicted prevalence. The land east of the valley is dry with few rivers (16,  
427 20). On the other hand, the high elevation and slopes in western Ethiopia experience much  
428 higher rainfall, resulting in fast-flowing rivers, a specific requirement for blackfly breeding and  
429 development. The response profile for slope indicates that there is an optimal slope for the  
430 prevalence of *O. volvulus* infection that may be related to the flow characteristics optimal for  
431 blackfly breeding.

432 The spatial pattern of *O. volvulus* infection prevalence predicted across Ethiopia by this  
433 geospatial model was consistent with previously published prevalence maps that were based on  
434 REMO and other data (17, 19). It is noteworthy that in those earlier maps and in this geospatially



435 predicted map there was a high level of spatial heterogeneity in infection prevalence, including  
436 heterogeneity within health districts (which are the implementation units for MDAl in Ethiopia).  
437 The difference between the highest and lowest prevalence pixel (range) within the districts was  
438 as high as 50%. A study in Cameroon reported that hypoendemic areas could sustain low-grade  
439 transmission and, therefore, might cause rapid recrudescence in neighboring meso- and  
440 hyperendemic areas where the transmission has been successfully controlled (56). Given that  
441 much of the unmapped onchocerciasis endemic areas of Ethiopia is hypoendemic, these areas  
442 must be identified and treated for elimination of transmission to be reached. Hence, we need to  
443 consider the spatial heterogeneity within and between the intervention units while planning the  
444 elimination programs.

445 We used a bivariate map to visualize estimated prevalence and the associated uncertainty (Fig 4).  
446 The presence/absence of data influences this uncertainty map; i.e., areas with ground truth data  
447 have lower prediction errors. This is expected in geostatistical models as they depend on the  
448 Euclidean distances between the reported observations (39). Thus, the uncertainty map can  
449 indicate where additional data would reduce the overall prediction error of the prevalence map,  
450 particularly in the areas with higher prevalence. This can be used to identify regions that might  
451 benefit from targeted re-mapping or elimination mapping efforts (3). For example, there are  
452 areas with higher prevalence in the west but varying uncertainty. The areas with high uncertainty  
453 could be targeted for re-mapping. Similarly, there are areas in the east with both low prevalence  
454 and lower uncertainty, i.e., with higher confidence, and thus, do not need to be re-mapped.

#### 455 **Ecological features associated with *O. volvulus* infection prevalence**

456 The major environmental factors significantly associated with infection prevalence were distance  
457 to the nearest river, soil moisture, precipitation seasonality, and flow accumulation. As expected,

458 there was a negative association between the distance to the nearest river and predicted  
459 prevalence. Onchocerciasis has long been recognized as being higher in communities near rivers  
460 and this correlation, which has been reported in prior geospatial modeling studies (19, 37, 39), is  
461 driven by blackfly breeding and development requirements for fast-flowing rivers, such that  
462 villages can be categorized epidemiologically as first, second, or third-line villages based on  
463 their proximity to vector breeding sites (39, 57, 58).

464 The relationship curve between the predicted prevalence and the distance to the nearest river  
465 shows that there is an initial rapid decline in prevalence followed by a less rapid decline as the  
466 distance from the river increases, and the curve asymptotes to a very low prevalence with  
467 increased uncertainty as the distance exceeds 100 km. A rapid decline in blackfly biting rate at  
468 increasing distance from a river breeding site, based on vector biting rate data collected in  
469 northern Cameroon over three years, has been reported previously (59). Similarly, a mark-  
470 recapture study found a logarithmic decline in the proportional fly biting density as the distance  
471 increased from the marking site (60), and a mark-release-recapture study in Ghana in West  
472 Africa reported the average flight range of *S. damnosum* may be as high as 27 km (58). While  
473 Ethiopia is host to several different competent blackfly vector species, the part of the curve  
474 where the change in slope declines is consistent with this estimated flight range viz., ~20-25 km.  
475 However, the curve does not reach its lowest point until 100 km, suggesting that the parasites  
476 could be transmitted beyond the average dispersal range of an individual blackfly. This could be  
477 because the dispersal range for gravid blood-seeking and ovipositing female blackflies has been  
478 reported to be greater than the average dispersal range at around 60-100 km from the river (58).  
479 In addition, wind-assisted long-distance migration of blackflies of hundreds of km and  
480 transmission due to the human migration have also been reported (61-63). Thus, this study

481 supports that longer range migration is likely and that it also likely contributes to *O. volvulus*  
482 transmission.

483 We observed a positive association between soil moisture and *O. volvulus* infection prevalence.  
484 Soil moisture is high in areas with high precipitation or near water bodies, including rivers—i.e.,  
485 where there are suitable blackfly breeding sites. Soil moisture is an indicator of agricultural  
486 suitability, and agricultural areas have historically known to have high prevalence of *O. volvulus*  
487 infection (19, 37, 64). Agricultural lands and farms in these areas tend to be near rivers for easy  
488 irrigation. Therefore, the increased prevalence of *O. volvulus* infection among people involved in  
489 agriculture and farming (37, 65, 66) is presumably because these workers are generally outdoors,  
490 often in proximity to rivers, and thus experience increased exposure to blackflies (7, 9, 67).

491 Flow accumulation is used in hydrogeology as a proxy for river grades and represents the  
492 cumulative number of cells in a raster object that flow into a given cell: high flow accumulation  
493 represents large rivers, and lower flow accumulation represents secondary rivers and their  
494 tributaries. It has been used to map onchocerciasis hotspots in hypoendemic settings of the  
495 Democratic Republic of Congo (68). In this study, flow accumulation was negatively associated  
496 with *O. volvulus* infection prevalence, meaning that the infection was more common in the  
497 communities near the secondary rivers and tributaries than the large rivers. The primary vectors  
498 of onchocerciasis in Ethiopia are *S. damnosum s.l.* and *S. neavei* (69). In a study describing the  
499 ecological study of West African *Simulium* spp., *S. damnosum s.l.* were found in rivers of  
500 medium width with a lower flow accumulation than the large size rivers (6). Furthermore, the  
501 important characteristic of *S. neavei* is the obligatory phoretic association of larvae with the  
502 freshwater crabs which are more common in sheltered smaller river streams in the forests than in  
503 larger rivers (70, 71). The forested riverine areas, where *S. neavei* are found, is a dominant

504 ecotype in southwestern midland and highlands of Ethiopia, where onchocerciasis is highly  
505 endemic and from where most of the data were collected for this study (9, 72).

506 Similarly, precipitation seasonality was also negatively associated with the predicted prevalence,  
507 i.e., the prevalence was high in the areas with lower precipitation seasonality. Areas with high  
508 precipitation seasonality might have ephemeral rather than perennial streams. If the breeding  
509 sites are ephemeral, blood-feeding by blackflies would only happen during some part of the year,  
510 lowering the annual biting rate, a key parameter in *O. volvulus* transmission (73-75). Southeast  
511 Ethiopia, characterized by low prevalence of *O. volvulus* infection, has high seasonality in  
512 precipitation that is characterized by two short wet seasons with a dry period in between (76).  
513 However, the southwestern areas where the disease is most endemic have low precipitation  
514 seasonality and high annual precipitation (77).

515 As one would expect, the environmental factors that were significantly associated with *O.*  
516 *volvulus* infection prevalence are all exert strong influence on vector breeding and thus impact  
517 blackfly density and biting rates. The implication of this strong association between determinants  
518 of vector breeding and infection prevalence implies that spatial variation in vector breeding  
519 drives the spatial variation of *O. volvulus* infection prevalence in Ethiopia and that the geospatial  
520 model we present here, based on nodule prevalence data, is also predictive of vector distribution.  
521 This suggests that ongoing climate change, which is affecting the pattern of precipitation (78,  
522 79), and other anthropogenic environmental changes such as changing river flow with the  
523 construction of river dams for hydroelectricity or irrigation might significantly change vector  
524 distribution and thus the spatial occurrence of the disease (80, 81). The impacts of these changes  
525 could be modeled using this approach.

## 526 **Model limitations and recommendations**

527 The geospatial model we report here incorporates different environmental and socio-  
528 demographic variables that are known to influence the transmission and prevalence of  
529 *O. volvulus* infection and the distribution of blackflies. However, the data incorporated in the  
530 model do not include all factors that may be epidemiologically relevant, such as direct/indirect  
531 interventions affecting infection prevalence and human behaviors that may increase or decrease  
532 the risk of infection. The non-uniform mean spatial field across the triangulation mesh shows  
533 that there might be some effects that are unaccounted for by the model (S6 Fig), and the  
534 possibility remains that an unidentified covariate that closely resembles the spatial field might  
535 aid in explaining the spatial variation in prevalence. In addition, the inclusion of blackfly  
536 distribution maps based on the identification of breeding sites and their productivity might  
537 improve the model fit. Unfortunately, such data are not available for Ethiopia.

538 Some variables that we expected may correlate with prevalence, such as human host population  
539 density and vegetation, were not shown to be significantly associated in these analyses.  
540 Blackflies are not usually reported to be found in dense urban environments and, similarly,  
541 vegetation cover is essential for blackfly breeding and thus *O. volvulus* transmission (37, 64, 82).  
542 We suggest that the lack of association might be because the country-wide spatial scale  
543 neutralizes factors that impact prevalence at a smaller geographic scale. Therefore, targeted  
544 spatial analysis in regions with differences in vegetation near rivers or with differences in rural-  
545 urban indices (83) might be helpful to explore the effects of these variables on infection  
546 prevalence. Furthermore, *O. volvulus* transmission is highly dynamic, not just spatially but also  
547 temporally. Extending the current spatial model to a spatio-temporal model might improve the

548 model fit, which requires both the prevalence and the covariate data at sufficient temporal  
549 resolution.

550 We could not include prevalence measures based on other diagnostic methods for Ethiopia  
551 because fine-scaled prevalence data based on mf counts from skin snips or antibody tests (Ov16)  
552 were not available. However, these data could be used as an alternative to, or in addition to,  
553 nodule prevalence. Combining data across methods is challenging, as correlations between mf  
554 counts and nodule counts can be highly variable (however, see (18)) and the correlation between  
555 these measures and Ov16 seropositivity prevalence is unclear. Nevertheless, the map presented  
556 here could be used by onchocerciasis elimination programs to direct resources for elimination  
557 mapping because elimination mapping of any disease can be expensive (3), and the method  
558 described here may be an inexpensive first step that can extrapolate country-wide prevalence  
559 from existing data and thus better target re-mapping efforts.

## 560 **Conclusion**

561 Onchocerciasis programs have transitioned from control of onchocerciasis as a public health  
562 problem to elimination of *O. volvulus* transmission, triggering the need to develop new tools to  
563 more efficiently prioritize decisions concerning elimination mapping and interventions in  
564 hypoendemic foci that were not previously targeted for intervention. To this end, we have  
565 generated a baseline pre-intervention prevalence map for the whole of Ethiopia using geospatial  
566 modelling that is based on pre-intervention nodule prevalence data and spatial variation in  
567 different environmental and socio-demographic factors. We extrapolated existing historical  
568 nodule prevalence measures to previously unmapped regions of Ethiopia and quantified  
569 uncertainty in predicted prevalence. This map could be used as an aid to decision making on  
570 where and how to (a) extend elimination mapping into areas identified as likely hypoendemic

571 foci and (b) prioritize the allocation of scarce health system resources to areas most likely to  
572 benefit from that allocation. Furthermore, this study found that hydrological variables such as  
573 distance to the nearest river, soil moisture, precipitation seasonality, and flow accumulation were  
574 significant in describing the spatial heterogeneity of *O. volvulus* infection in Ethiopia. All these  
575 ecological features are related to the suitability of an area for vector breeding, movement, biting  
576 behavior, and density, leading to the conclusion that vector suitability and movement are the  
577 primary determinants of the spatial distribution of *O. volvulus* infection in Ethiopia.  
578 Consequently, changes in these ecological features due to anthropomorphic changes in climate,  
579 agriculture, vegetation type (e.g., slash-and-clear), or construction of hydroelectric or irrigation  
580 dams might significantly alter the occurrence of the disease. We suggest, therefore, that the  
581 importance of these vector-related ecological factors in determining infection distribution and  
582 intensity reaffirms that inclusion of vector control could augment current interventions based  
583 primarily on prophylactic chemotherapy.

#### 584 **Acknowledgements**

585 The authors wish to acknowledge Mr Sindew M. Feleke at the Ethiopian Public Health Institute  
586 (EPHI), Dr Moses Katarwa at the Carter Center for assistance in navigating the data sources  
587 and providing insights into Ethiopian control programs, and Dr Katie Crawford and Mr Haylo  
588 Roberts for helpful discussion during the analysis.

## 589 References

- 590 1. Diggle P, Ribeiro PJ. Model-based geostatistics. New York, NY: Springer; 2007.
- 591 2. Moraga P. Geospatial health data: modeling and visualization with R-INLA and Shiny.  
592 Boca Raton: CRC Press; 2020.
- 593 3. Rebollo MP, Zoure H, Ogoussan K, Sodahlon Y, Ottesen EA, Cantey PT.  
594 Onchocerciasis: shifting the target from control to elimination requires a new first-step—  
595 elimination mapping. *International Health*. 2018;10(suppl\_1):i14-i9.
- 596 4. Diggle P. Model-based geostatistics for global public health: methods and applications.  
597 Boca Raton: Taylor & Francis; 2019.
- 598 5. Eneanya OA, Fronterre C, Anagbogu I, Okoronkwo C, Garske T, Cano J, et al. Mapping  
599 the baseline prevalence of lymphatic filariasis across Nigeria. *Parasites & Vectors*.  
600 2019;12(1):440.
- 601 6. Cheke RA, Young S, Garms R. Ecological characteristics of *Simulium* breeding sites in  
602 West Africa. *Acta Tropica*. 2017;167:148-56.
- 603 7. Adeleke MA, Mafiana CF, Sam-Wobo SO, Olatunde GO, Ekpo UF, Akinwale OP, et al.  
604 Biting behaviour of *Simulium damnosum* complex and *Onchocerca volvulus* infection along the  
605 Osun River, Southwest Nigeria. *Parasites & vectors*. 2010;3(1):1–7.
- 606 8. Lambertson PH, Cheke RA, Walker M, Winskill P, Osei-Atweneboana MY, Tirados I, et  
607 al. Onchocerciasis transmission in Ghana: biting and parous rates of host-seeking sibling species  
608 of the *Simulium damnosum* complex. *Parasites & Vectors*. 2014;7(1):511.
- 609 9. Mose AD, Mamo BT, Alamirew SY. Monthly dynamics and biting behavior of principal  
610 onchocerciasis vector (*Simulium damnosum sl*) in endemic area of Southwest Ethiopia.  
611 *International Journal of One Health*. 2020;6(1):23–8.
- 612 10. Basáñez M-G, Pion SDS, Churcher TS, Breitling LP, Little MP, Boussinesq M. River  
613 Blindness: A Success Story under Threat? *PLoS Medicine*. 2006;3(9):e371.
- 614 11. Chesnais CB, Nana-Djeunga HC, Njamnshi AK, Lenou-Nanga CG, Boullé C, Bissek A-  
615 CZ-K, et al. The temporal relationship between onchocerciasis and epilepsy: a population-based  
616 cohort study. *The Lancet Infectious Diseases*. 2018;18(11):1278-86.
- 617 12. Colebunders R, Njamnshi AK, van Oijen M, Mukendi D, Kashama JM, Mandro M, et al.  
618 Onchocerciasis-associated epilepsy: From recent epidemiological and clinical findings to policy  
619 implications. *Epilepsia Open*. 2017;2(2):145–52.
- 620 13. Katarbwa MN, Zarroug IMA, Negussu N, Aziz NM, Tadesse Z, Elmubark WA, et al.  
621 The Galabat-Metema cross-border onchocerciasis focus: The first coordinated interruption of  
622 onchocerciasis transmission in Africa. *PLOS Neglected Tropical Diseases*.  
623 2020;14(2):e0007830.
- 624 14. Vlamincck J, Fischer PU, Weil GJ. Diagnostic Tools for Onchocerciasis Elimination  
625 Programs. *Trends in Parasitology*. 2015;31(11):571-82.
- 626 15. Noma M, Nwoke BEB, Nutall I, Tambala PA, Enyong P, Namsenmo A, et al. Rapid  
627 epidemiological mapping of onchocerciasis (REMO): its application by the African Programme  
628 for Onchocerciasis Control (APOC). *Annals of Tropical Medicine & Parasitology*.  
629 2002;96(sup1):S29-S39.
- 630 16. Noma M, Zouré HG, Tekle AH, Enyong PA, Nwoke BE, Remme JH. The geographic  
631 distribution of onchocerciasis in the 20 participating countries of the African Programme for  
632 Onchocerciasis Control: (1) priority areas for ivermectin treatment. *Parasites & Vectors*.  
633 2014;7(1):325.



- 634 17. Zouré HG, Noma M, Tekle AH, Amazigo UV, Diggle PJ, Giorgi E, et al. The geographic  
635 distribution of onchocerciasis in the 20 participating countries of the African Programme for  
636 Onchocerciasis Control: (2) pre-control endemicity levels and estimated number infected.  
637 *Parasites & Vectors*. 2014;7(1):326.
- 638 18. Coffeng LE, Pion SDS, O'Hanlon S, Cousens S, Abiose AO, Fischer PU, et al.  
639 Onchocerciasis: The Pre-control Association between Prevalence of Palpable Nodules and Skin  
640 Microfilariae. *PLoS Neglected Tropical Diseases*. 2013;7(4):e2168.
- 641 19. Cromwell EA, Osborne JCP, Unnasch TR, Basáñez M-G, Gass KM, Barbre KA, et al.  
642 Predicting the environmental suitability for onchocerciasis in Africa as an aid to elimination  
643 planning. *PLOS Neglected Tropical Diseases*. 2021;15(7):e0008824.
- 644 20. Meribo K, Kebede B, Feleke SM, Mengistu B, Mulugeta A, Sileshi M, et al. Review of  
645 Ethiopian onchocerciasis elimination programme. *Ethiopian medical journal*. 2017;55(Suppl  
646 1):55.
- 647 21. Feleke SM, Tadesse G, Mekete K, Tekle AH, Kebede A. Epidemiological Mapping of  
648 Human Onchocerciasis in Transmission Suspected Districts of Bale, Borena, and West Arsi  
649 Zones of Eastern Ethiopia. *Interdisciplinary Perspectives on Infectious Diseases*. 2016;2016:1-5.
- 650 22. Mengitsu B, Shafi O, Kebede B, Kebede F, Worku DT, Herero M, et al. Ethiopia and its  
651 steps to mobilize resources to achieve 2020 elimination and control goals for neglected tropical  
652 diseases: Spider webs joined can tie a lion. *International Health*. 2016;8(suppl 1):i34-i52.
- 653 23. Katarbwa MN, Endeshaw T, Taye A, Tadesse Z, Frank RO. The disappearance of  
654 onchocerciasis without intervention in Tigray Region in Northwest Ethiopia. *Pathogens and  
655 Global Health*. 2014;108(3):123-.
- 656 24. Ayalew F, Atnafu DD, Bedimo M, Mulatu K. Determinants of community-led ivermectin  
657 treatment adherence for onchocerciasis control in Western Ethiopia: a case-control study.  
658 *Tropical Medicine and Health*. 2020;48(1):22.
- 659 25. Kifle B, Nigatu M. Compliance to a Five-Year Biannual Ivermectin Treatment for  
660 Onchocerciasis Elimination and Its Determinants among Adults in the Bench Maji Zone,  
661 Southwest Ethiopia: A Community-Based Cross-Sectional Study. *Journal of Parasitology  
662 Research*. 2021;2021:e8866639.
- 663 26. Yirga D, Deribe K, Woldemichael K, Wondafrash M, Kassahun W. Factors associated  
664 with compliance with community directed treatment with ivermectin for onchocerciasis control  
665 in Southwestern Ethiopia. *Parasites & Vectors*. 2010;3(1):48.
- 666 27. Gebrezgabiher G, Mekonnen Z, Yewhalaw D, Hailu A. Reaching the last mile: main  
667 challenges relating to and recommendations to accelerate onchocerciasis elimination in Africa.  
668 *Infectious Diseases of Poverty*. 2019;8(1):60.
- 669 28. Lakwo T, Oguttu D, Ukety T, Post R, Bakajika D. Onchocerciasis Elimination: Progress  
670 and Challenges. *Research and Reports in Tropical Medicine*. 2020;11:81-95.
- 671 29. Hamley JID, Blok DJ, Walker M, Milton P, Hopkins AD, Hamill LC, et al. What does  
672 the COVID-19 pandemic mean for the next decade of onchocerciasis control and elimination?  
673 *Transactions of The Royal Society of Tropical Medicine and Hygiene*. 2021;115(3):269-80.
- 674 30. Plaisier AP, Alley ES, van Oortmarssen GJ, Boatman BA, Habbema JD. Required duration  
675 of combined annual ivermectin treatment and vector control in the Onchocerciasis Control  
676 Programme in west Africa. *Bulletin of the World Health Organization*. 1997;75(3):237-45.
- 677 31. Remme J, Dadzie KY, Rolland A, Thylefors B. Ocular onchocerciasis and intensity of  
678 infection in the community. I. West African savanna. *Tropical medicine and parasitology*.  
679 1989;40(3):340-7.

- 680 32. Winnen M, Plaisier AP, Alley ES, Nagelkerke NJD, van Oortmarssen G, Boatin BA, et  
681 al. Can ivermectin mass treatments eliminate onchocerciasis in Africa? Bulletin of the World  
682 Health Organization. 2002;80(5):384-91.
- 683 33. Kang SY, Battle KE, Gibson HS, Ratsimbao A, Randrianarivejosia M, Ramboarina  
684 S, et al. Spatio-temporal mapping of Madagascar's Malaria Indicator Survey results to assess  
685 *Plasmodium falciparum* endemicity trends between 2011 and 2016. BMC Medicine.  
686 2018;16(1):71.
- 687 34. ESPEN. Site level onchocerciasis prevalence data. Data. ESPEN; 2020 2020.
- 688 35. Ngoumou P, Walsh JF, others. A manual for rapid epidemiological mapping of  
689 onchocerciasis. World Health Organization; 1993 1993.
- 690 36. Barro AS, Oyana TJ. Predictive and epidemiologic modeling of the spatial risk of human  
691 onchocerciasis using biophysical factors: A case study of Ghana and Burundi. Spatial and  
692 Spatio-temporal Epidemiology. 2012;3(4):273-85.
- 693 37. Eneanya OA, Koudou BG, Aboulaye M, Elvis AA, Souleymane Y, Kouakou M-M, et al.  
694 Progress towards onchocerciasis elimination in Côte d'Ivoire: A geospatial modelling study.  
695 PLOS Neglected Tropical Diseases. 2021;15(2):e0009091.
- 696 38. Gorelick N, Hancher M, Dixon M, Ilyushchenko S, Thau D, Moore R. Google Earth  
697 Engine: Planetary-scale geospatial analysis for everyone. Remote Sensing of Environment.  
698 2017;202:18-27.
- 699 39. O'Hanlon SJ, Slater HC, Cheke RA, Boatin BA, Coffeng LE, Pion SDS, et al. Model-  
700 Based Geostatistical Mapping of the Prevalence of *Onchocerca volvulus* in West Africa. PLOS  
701 Neglected Tropical Diseases. 2016;10(1):e0004328.
- 702 40. van den Hoogen J, Geisen S, Routh D, Ferris H, Traunspurger W, Wardle DA, et al. Soil  
703 nematode abundance and functional group composition at a global scale. Nature.  
704 2019;572(7768):194-8.
- 705 41. Hijmans RJ, Van Etten J, Cheng J, Mattiuzzi M, Sumner M, Greenberg JA, et al. Package  
706 'raster'. R package. 2015;734.
- 707 42. Team R. RStudio: Integrated Development Environment for R. Boston, MA: RStudio,  
708 PBC; 2021 2021.
- 709 43. Team RC. R: A Language and Environment for Statistical Computing. Vienna, Austria:  
710 R Foundation for Statistical Computing; 2021 2021.
- 711 44. Fox J, Weisberg S. An R Companion to Applied Regression. Third ed. Thousand Oaks  
712 CA: Sage; 2019 2019.
- 713 45. Schloerke B, Crowley J, Cook D. Package 'GGally'. Extension to 'ggplot2.' See  
714 <https://cran.r-project.org/web/packages/GGally/> ...; 2018.
- 715 46. Moraga P, Cano J, Baggaley RF, Gyapong JO, Njenga SM, Nikolay B, et al. Modelling  
716 the distribution and transmission intensity of lymphatic filariasis in sub-Saharan Africa prior to  
717 scaling up interventions: integrated use of geostatistical and mathematical modelling. Parasites &  
718 Vectors. 2015;8(1):560.
- 719 47. Lezama-Ochoa N, Pennino MG, Hall MA, Lopez J, Murua H. Using a Bayesian  
720 modelling approach (INLA-SPDE) to predict the occurrence of the Spinetail Devil Ray (*Mobular*  
721 *mobular*). Scientific Reports. 2020;10(1):18822.
- 722 48. Blangiardo M, Cameletti M. Spatial and spatio-temporal Bayesian models with R-INLA.  
723 Chichester, West Sussex: John Wiley and Sons, Inc; 2015 2015. 1 p.

- 724 49. Karagiannis-Voules D-A, Scholte RGC, Guimarães LH, Utzinger J, Vounatsou P.  
725 Bayesian Geostatistical Modeling of Leishmaniasis Incidence in Brazil. *PLoS Neglected*  
726 *Tropical Diseases*. 2013;7(5):e2213.
- 727 50. Osgood-Zimmerman A, Millier AI, Stubbs RW, Shields C, Pickering BV, Earl L, et al.  
728 Mapping child growth failure in Africa between 2000 and 2015. *Nature*. 2018;555(7694):41-7.
- 729 51. Clayton D, Kaldor J. Empirical Bayes estimates of age-standardized relative risks for use  
730 in disease mapping. *Biometrics*. 1987:671–81.
- 731 52. Asmarian N, Ayatollahi SMT, Sharafi Z, Zare N. Bayesian Spatial Joint Model for  
732 Disease Mapping of Zero-Inflated Data with R-INLA: A Simulation Study and an Application to  
733 Male Breast Cancer in Iran. *International Journal of Environmental Research and Public Health*.  
734 2019;16(22):4460.
- 735 53. Lindgren F, Rue Ha, Lindström J. An explicit link between Gaussian fields and Gaussian  
736 Markov random fields: the stochastic partial differential equation approach. *Journal of the Royal*  
737 *Statistical Society: Series B (Statistical Methodology)*. 2011;73(4):423–98.
- 738 54. Cameletti M, Lindgren F, Simpson D, Rue H. Spatio-temporal modeling of particulate  
739 matter concentration through the SPDE approach. *AStA Advances in Statistical Analysis*.  
740 2013;97(2):109-31.
- 741 55. Moraga P, Dean C, Inoue J, Morawiecki P, Noureen SR, Wang F. Bayesian spatial  
742 modelling of geostatistical data using INLA and SPDE methods: A case study predicting malaria  
743 risk in Mozambique. *Spatial and Spatio-temporal Epidemiology*. 2021;39:100440.
- 744 56. Katarwa MN, Eyamba A, Chouaibou M, Enyong P, Kuété T, Yaya S, et al. Does  
745 onchocerciasis transmission take place in hypoendemic areas? a study from the North Region of  
746 Cameroon: Does onchocerciasis transmission take place in hypoendemic areas? *Tropical*  
747 *Medicine & International Health*. 2010;15(5):645-52.
- 748 57. Ngoumou P, Walsh JF, Mace JM. A rapid mapping technique for the prevalence and  
749 distribution of onchocerciasis: a Cameroon case study. *Annals of Tropical Medicine and*  
750 *Parasitology*. 1994;88(5):463-74.
- 751 58. WHO. Report of the Third Meeting of the WHO Onchocerciasis Technical Advisory  
752 Subgroup Geneva, Switzerland, 26–28 February 2019. 2020 2020.
- 753 59. Renz A, Wenk P. Studies on the dynamics of transmission of onchocerciasis in a Sudan-  
754 savanna area of North Cameroon I: Prevailing *Simulium* vectors, their biting rates and age-  
755 composition at different distances from their breeding sites. *Annals of Tropical Medicine &*  
756 *Parasitology*. 1987;81(3):215-28.
- 757 60. Thompson BH. Studies on the flight range and dispersal of *Simulium damnosum*  
758 (Diptera: Simuliidae) in the rain-forest of Cameroon. *Annals of Tropical Medicine &*  
759 *Parasitology*. 1976;70(3):343-54.
- 760 61. Baker RHA, Guillet P, Sékétéli A, Poudiogo P, Boakye D, Wilson MD, et al. Progress  
761 in controlling the reinvasion of windborne vectors into the western area of the Onchocerciasis  
762 Control Programme in West Africa. *Philosophical Transactions of the Royal Society of London*  
763 *B, Biological Sciences*. 1990;328(1251):731-50.
- 764 62. Garms R, Walsh JF, Davies JB. Studies on the reinvasion of the Onchocerciasis Control  
765 Programme in the Volta River Basin by *Simulium damnosum s.l.* with emphasis on the south-  
766 western areas. *Tropenmedizin Und Parasitologie*. 1979;30(3):345-62.
- 767 63. Hedtke SM, Kuesel AC, Crawford KE, Graves PM, Boussinesq M, Lau CL, et al.  
768 Genomic Epidemiology in Filarial Nematodes: Transforming the Basis for Elimination Program  
769 Decisions. *Frontiers in Genetics*. 2020;10:1282.

- 770 64. De Sole G, Kloos H. Transmission patterns of onchocerciasis in southwest Ethiopia.  
771 *Parassitologia*. 1976;18(1-3):53-65.
- 772 65. Dunn C, Callahan K, Katarawa M, Richards F, Hopkins D, Jr PCW, et al. The  
773 Contributions of Onchocerciasis Control and Elimination Programs toward the Achievement of  
774 the Millennium Development Goals. *PLOS Neglected Tropical Diseases*. 2015;9(5):e0003703.
- 775 66. Oladepo O, Brieger WR, Otusanya S, Kale OO, Offiong S, Titiloye M. Farm land size  
776 and onchocerciasis status of peasant farmers in south-western Nigeria. *Tropical Medicine &*  
777 *International Health*. 1997;2(4):334-40.
- 778 67. Opoku AA. The ecology and biting activity of blackflies (Simuliidae) and the prevalence  
779 of onchocerciasis in an agricultural community in Ghana. *West African Journal of Applied*  
780 *Ecology*. 2006;9(1).
- 781 68. Kelly-Hope LA, Unnasch TR, Stanton MC, Molyneux DH. Hypo-endemic  
782 onchocerciasis hotspots: defining areas of high risk through micro-mapping and environmental  
783 delineation. *Infectious Diseases of Poverty*. 2015;4:36.
- 784 69. Ethiopia FMOH. Guidelines for onchocerciasis elimination in Ethiopia 2015 [updated  
785 2015].
- 786 70. Lewis DJ, Hanney PW. On the *Simulium neavei* complex (Diptera: Simuliidae).  
787 *Proceedings of the Royal Entomological Society of London Series B, Taxonomy*. 1965;34(1-  
788 2):12-6.
- 789 71. McMahon JP. The Discovery of the early Stages of *Simulium neavei* in phoretic  
790 Association with Crabs and a Description of the Pupa and the Male. *Bulletin of Entomological*  
791 *Research*. 1951;42(2):419-26.
- 792 72. Taye A, Gebre-Michael T, Taticheff S. Onchocerciasis in Gilgel Ghibe River valley  
793 Southwest Ethiopia. *East African Medical Journal*. 2000;77(2).
- 794 73. Dietz K. The population dynamics of onchocerciasis. In: Anderson RM, editor. *The*  
795 *Population Dynamics of Infectious Diseases: Theory and Applications*. Population and  
796 *Community Biology*. Boston, MA: Springer US; 1982. p. 209-41.
- 797 74. Duerr HP, Eichner M. Epidemiology and control of onchocerciasis: The threshold biting  
798 rate of savannah onchocerciasis in Africa. *International Journal for Parasitology*.  
799 2010;40(6):641-50.
- 800 75. Duerr HP, Raddatz G, Eichner M. Control of onchocerciasis in Africa: Threshold shifts,  
801 breakpoints and rules for elimination. *International Journal for Parasitology*. 2011;41(5):581-9.
- 802 76. Liebmann B, Bladé I, Kiladis GN, Carvalho LMV, B. Senay G, Allured D, et al.  
803 Seasonality of African Precipitation from 1996 to 2009. *Journal of Climate*. 2012;25(12):4304-  
804 22.
- 805 77. Fick SE, Hijmans RJ. WorldClim 2: new 1-km spatial resolution climate surfaces for  
806 global land areas. *International Journal of Climatology*. 2017;37(12):4302-15.
- 807 78. Cheke RA, Basáñez M-G, Perry M, White MT, Garms R, Obuobie E, et al. Potential  
808 effects of warmer worms and vectors on onchocerciasis transmission in West Africa.  
809 *Philosophical Transactions of the Royal Society B: Biological Sciences*.  
810 2015;370(1665):20130559.
- 811 79. Viste E, Korecha D, Sorteberg A. Recent drought and precipitation tendencies in  
812 Ethiopia. *Theoretical and Applied Climatology*. 2013;112(3-4):535-51.
- 813 80. Abong RA, Amambo GN, Hamid AA, Enow BA, Beng AA, Nietcho FN, et al. The  
814 Mbam drainage system and onchocerciasis transmission post ivermectin mass drug

- 815 administration (MDA) campaign, Cameroon. PLOS Neglected Tropical Diseases.  
816 2021;15(1):e0008926.
- 817 81. Zarroug IMA, Elaagip A, Gumaa SG, Ali AK, Ahmed A, Siam HAM, et al. Notes on  
818 distribution of *Simulium damnosum s. l.* along Atbara River in Galabat sub-focus, eastern Sudan.  
819 BMC Infectious Diseases. 2019;19(1):477.
- 820 82. Macé JM, Boussinesq M, Ngoumou P, Enyegue Oye J, Koéranga A, Godin C. Country-  
821 wide rapid epidemiological mapping of onchocerciasis (REMO) in Cameroon. Annals of  
822 Tropical Medicine & Parasitology. 1997;91(4):379-91.
- 823 83. Pesaresi M, Freire S. GHS settlement grid, following the REGIO model 2014 in  
824 application to GHSL Landsat and CIESIN GPW v4-multitemporal (1975-1990-2000-2015).  
825 2016.
- 826
